# Supplementary material
Source: bioRxiv or medRxiv preprint supplement (https://www.biorxiv.org/highwire/filestream/42891/field_highwire_adjunct_files/1/145060-2.pdf)

Supplemental Figure 2.

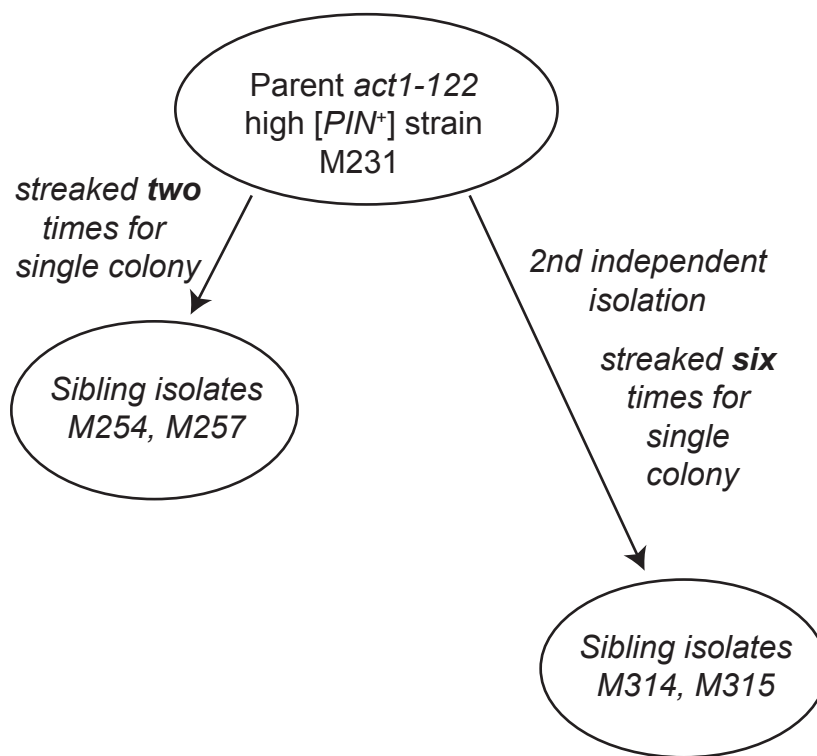

Supplement: Supplementary file [file 145060-2.pdf]
